# Supplementary material
Source: PubMed Central journal article supplement (PMC4418927)
Supplement: NIHMS683902-supplement-video_legend.pdf [file NIHMS683902-supplement-video_legend.pdf]

**Video 1. Patient 11, Inferior Rectus and Lateral Rectus Recession, Right Eye** Post-operative iris angiogram video beginning at the time of vessel filling and ending with slow filling of collateral circulation in area of inferotemporal iris filling defect.
